# Supplementary material
Source: Springer Nature journal article supplement (https://www.springermedizin.de/resource/supplementary/12935_2010_247_MOESM2_ESM.pdf/9540138)

**ABCC1**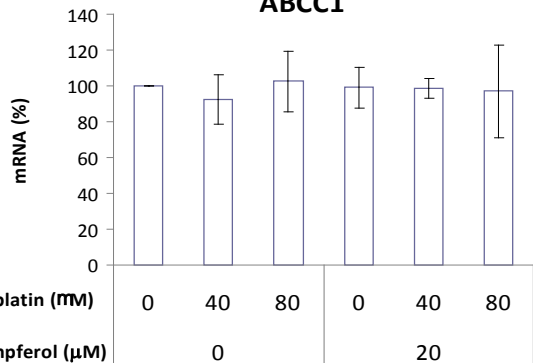**ABCC5**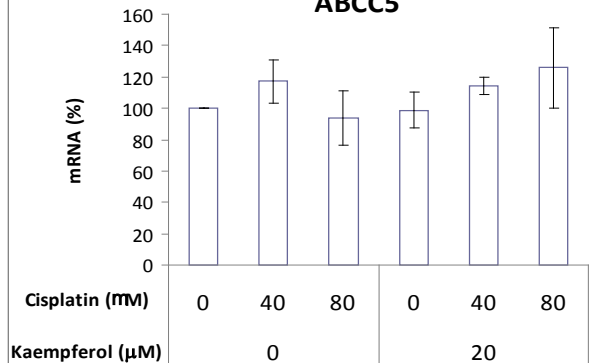**ABCC6**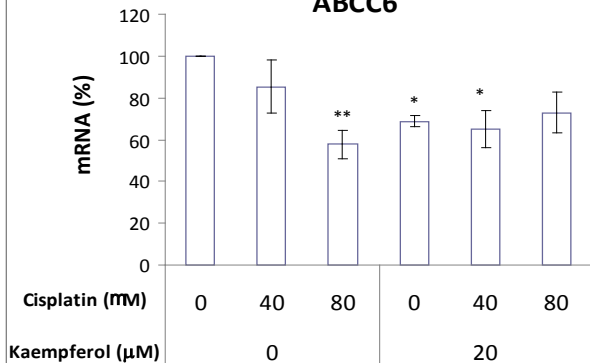**NFκB1**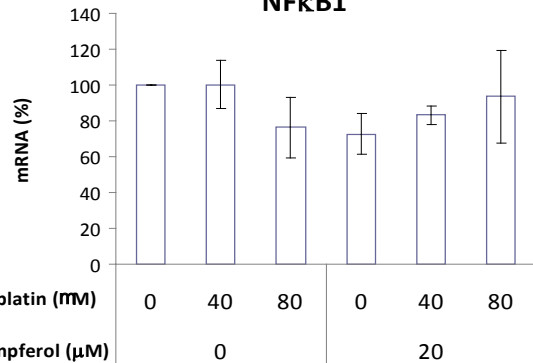**cMyc**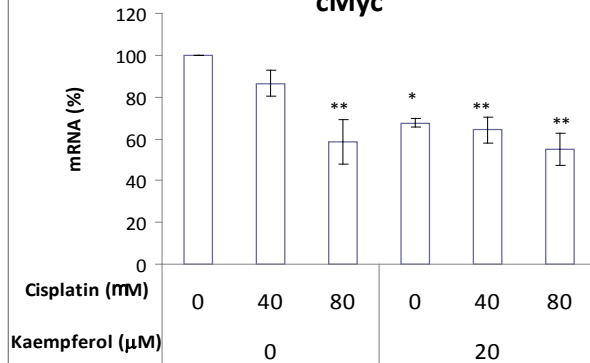**CDKN1A**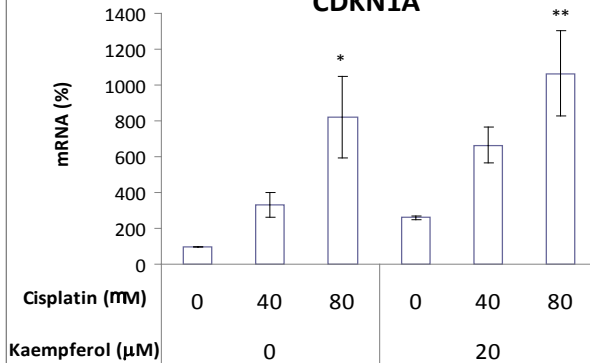

Supplement: MOESM2 [file 9540138]
